# Supplementary material
Source: PubMed Central journal article supplement (PMC2667983)
Supplement: mmc1.pdf [file mmc1.pdf]

## Supplemental Data

# Winter Temperature and UV Are Tightly Linked to Genetic Changes in the p53 Tumor Suppressor Pathway in Eastern Asia

Hong Shi, Si-jie Tan, Hua Zhong, Wenwei Hu, Arnold Levine, Chun-jie Xiao, Yi Peng, Xue-bin Qi, Wei-hua Shou, Run-lin Z. Ma, Yi Li, Bing Su, and Xin Lu

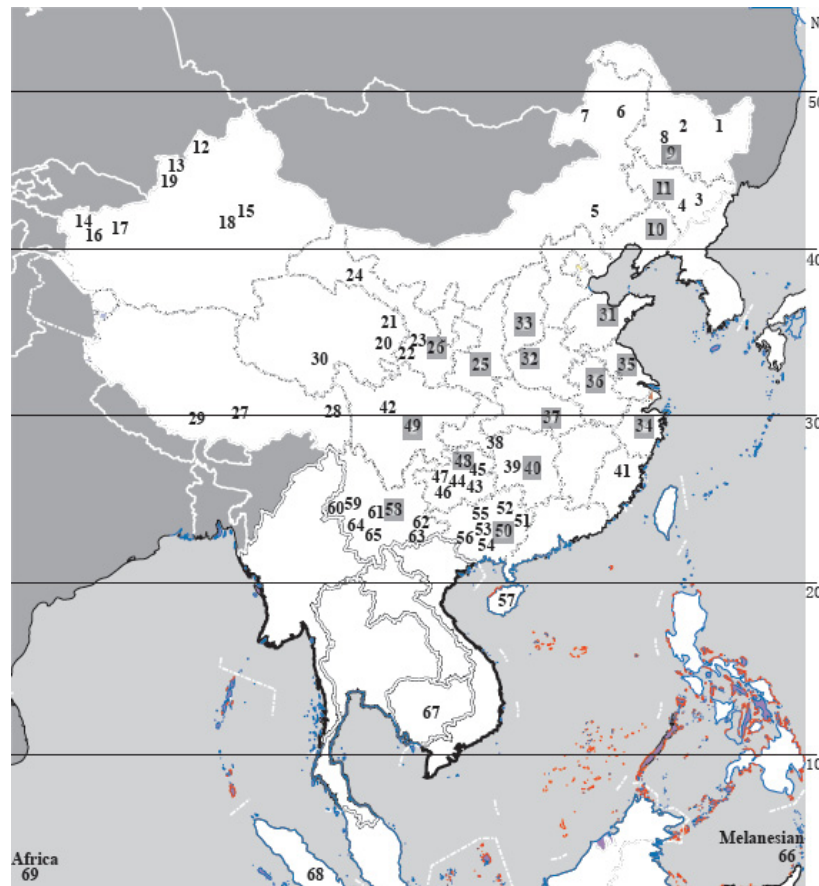

**Figure S1.** The geographic locations of the 67 eastern Asian populations sampled in this study. A map of China is shown indicating the locations of the 67 populations studied at different latitudes, as indicated by horizontal lines. The 17 Han Chinese populations are highlighted in shadows. Three control populations were also sampled with two from Africa and one from Melanesia.

Note: 1, Hezhe; 2, Oroqen; 3, Korea(Jilin); 4, Manchu(Liaonin); 5, Mongol; 6, Daur; 7, Ewenki; 8, Manchu(Heilongjiang); 9, Han(Heilongjiang); 10, Han(Liaonin); 11, Han(Jilin); 12, Russ; 13, Uzbek; 14, Tajik; 15, Kazak; 16, Khalkhas; 17, Uigur; 18, Tatar; 19, Xibe; 20, Salar; 21, Tu; 22, Baonan; 23, Dongxiang; 24, Yugur; 25, Han(Shannxi); 26, Han(Gansu); 27, Tibetan1(Dangxiong); 28, Tibetan2(Changdou); 29, Tibetan3(Rikaze); 30, Tibetan(Qinghai); 31, Han(Shandong); 32, Han(Henan); 33, Han(Shanxi); 34, Han(zhejiang); 35, Han(Jiangsu); 36,

Han(Anhui); 37, Han(Hubei); 38, Tujia; 39, Dong(Hunan); 40, Han(Hunan); 41, She(Fujian); 42, Qiang; 43, Dong(Guizhou); 44, Gelo; 45, Miao(Guizhou); 46, Buyi; 47, Shui; 48, Han(Guizhou); 49, Han(Sichuan); 50, Hakka(Guangxi); 51, Dong(Guangxi); 52, Yao(Guangxi); 53, Mulam; 54, Chuang(Guangxi); 55, Maonan; 56, Gin; 57, Li; 58, Han(Yunnan); 59, De'ang; 60, Jingpo; 61, Yi; 62, Chuang(Yunnan); 63, Miao(Yunnan); 64, Wa; 65, Dai; 66, Melanesian; 67, Cambodian; 68, Indonesian; 69, Africans(Pygmy and Ethiopian)

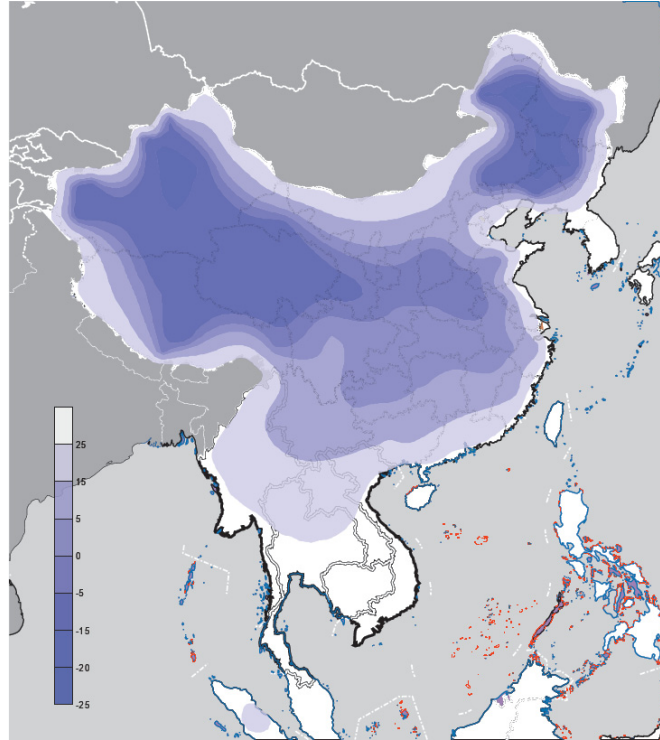

**Figure S2.** A contour map of winter temperature in eastern Asia.

The average winter temperatures of the 67 geographic locations where the 67 populations reside were used in constructing the map.

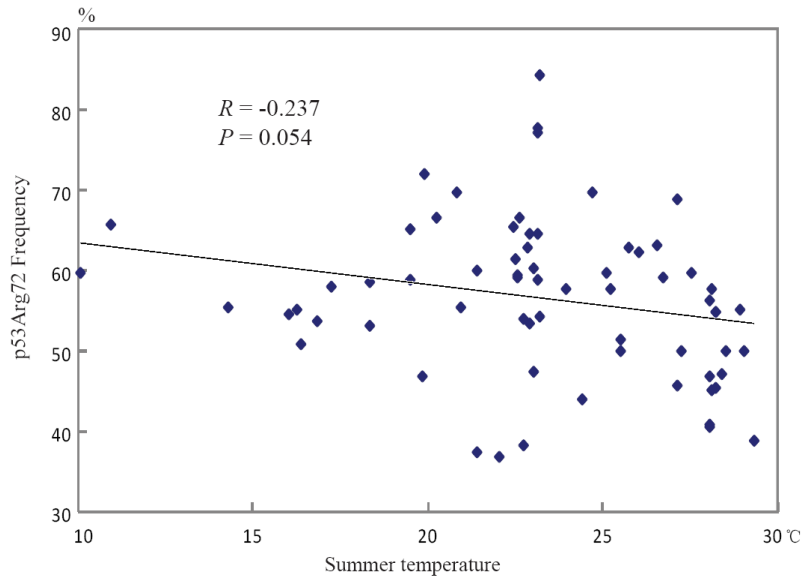

**Figure S3.** The correlation of p53Arg72 allele frequency with summer temperature in the 67 populations.

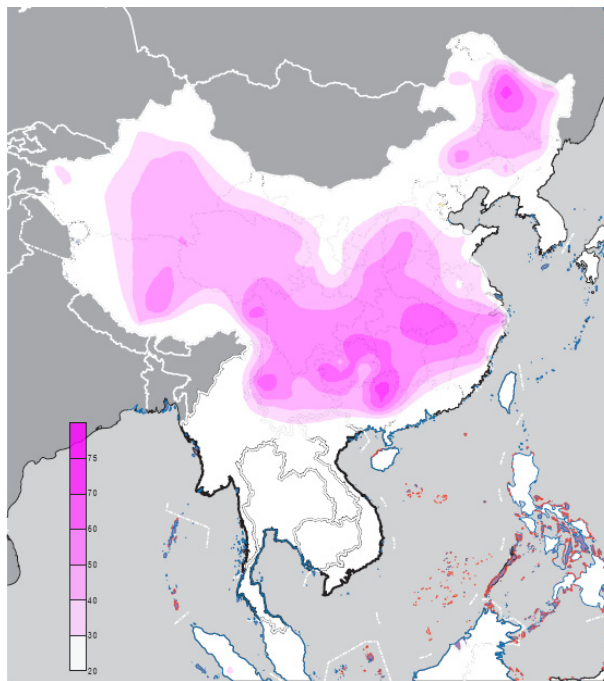

**Figure S4.** A contour map of MDM2 SNP309 G/G homozygote frequency distribution of the 67 populations in eastern Asia.

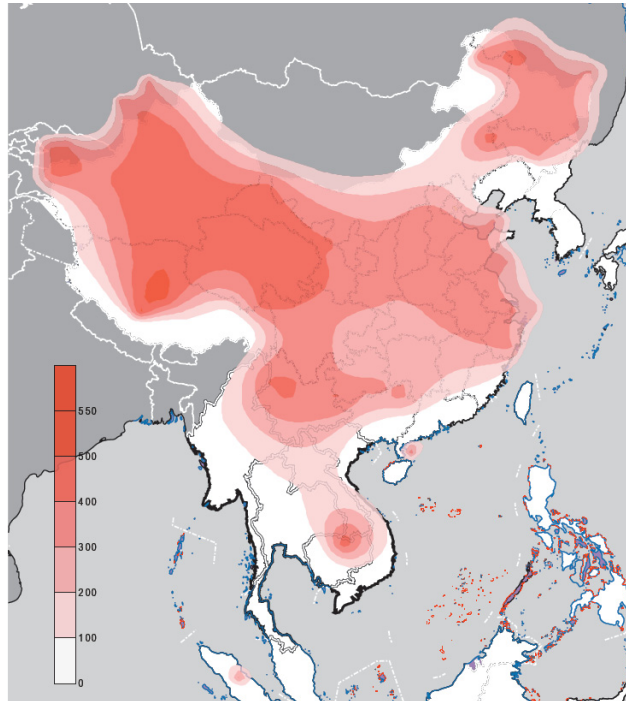

**Figure S5.** A contour map of UV radiation intensity in eastern Asia. The average annual UV radiation intensities of the 67 geographic locations where the 67 populations reside were used.

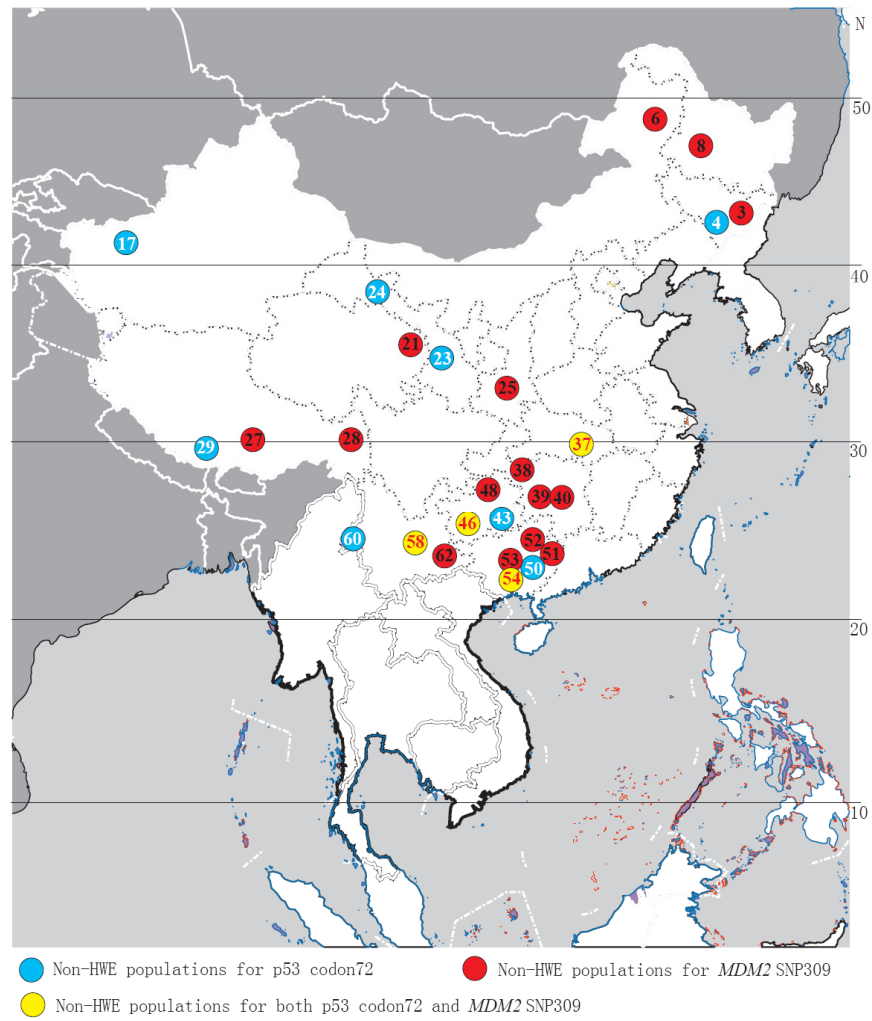

**Figure S6.** The geographic locations of the non-HWE populations.

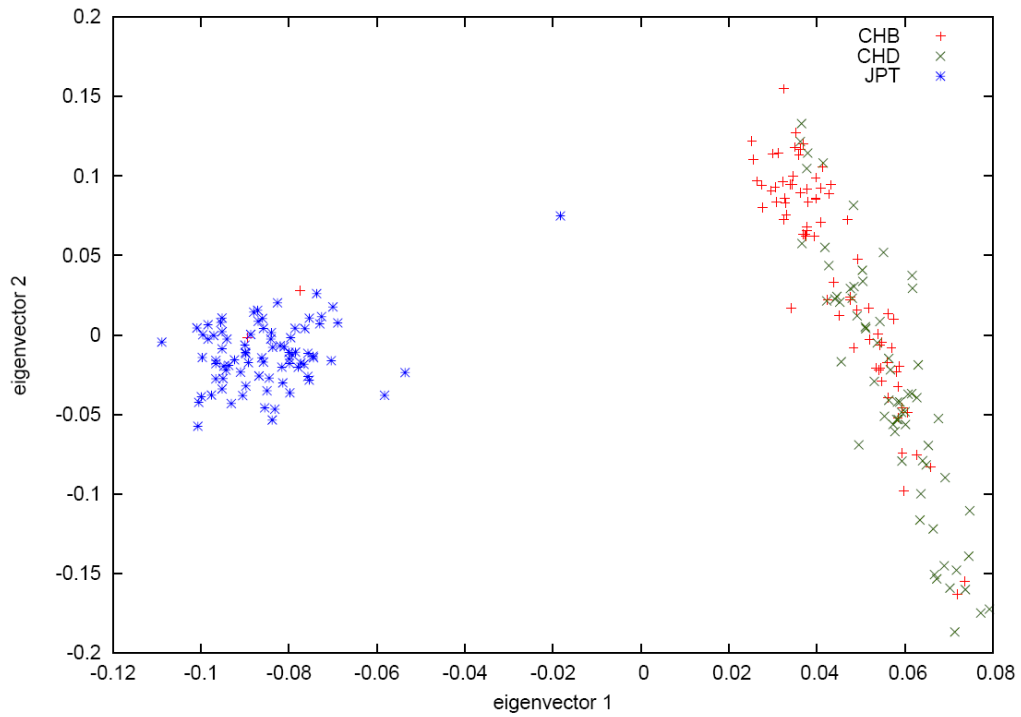

**Figure S7.** The relatedness among Han Chinese populations.

**Note:** This PCA map was constructed using Eigensoft. The genome-wide SNP analysis of three populations from Hapmap data (1,467,805 SNPs) was conducted, including one Japanese population (JPT, 82 individuals from Tokyo) and two Han Chinese populations, *i.e.* the CHB population (82 northern Han Chinese) and the CHD (70 Han Chinese from Denver of the States with different geographic origins in China).



**Table S2.** The correlation coefficient values after Bonferroni correction.

| Environmental Factors | Populations |             | p53 Codon72       |        |                   |                   | MDM2 SNP309 |                  |                   |                   |
|-----------------------|-------------|-------------|-------------------|--------|-------------------|-------------------|-------------|------------------|-------------------|-------------------|
|                       |             |             | PP                | RP     | RR                | R                 | TT          | TG               | GG                | G                 |
| Latitude              | All (67)    | populations | <b>-0.478(**)</b> | -0.221 | <b>0.611(**)</b>  | <b>0.640(**)</b>  | 0.008       | 0.195            | -0.193            | -0.153            |
|                       | Han (17)    | population  | -0.378            | -0.372 | <b>0.699(**)</b>  | <b>0.672(**)</b>  | -0.140      | 0.212            | -0.132            | -0.039            |
| UV Radiation          | All (67)    | populations | -0.211            | -0.013 | 0.189             | 0.232             | -0.044      | <b>0.455(**)</b> | <b>-0.426(**)</b> | <b>-0.319(**)</b> |
|                       | Han (17)    | population  | -0.027            | -0.144 | 0.173             | 0.130             | -0.112      | <b>0.569(*)</b>  | -0.509            | -0.344            |
| Winter Temperature    | All (67)    | populations | <b>0.512(**)</b>  | 0.213  | <b>-0.631(**)</b> | <b>-0.670(**)</b> | 0.036       | -0.177           | 0.153             | 0.104             |
|                       | Han (17)    | population  | 0.420             | 0.377  | <b>-0.739(**)</b> | <b>-0.772(**)</b> | 0.043       | -0.124           | 0.100             | 0.058             |
| Summer Temperature    | All (67)    | populations | 0.197             | 0.046  | -0.209            | -0.237            | 0.026       | -0.183           | 0.169             | 0.125             |
|                       | Han (17)    | population  | 0.028             | 0.270  | -0.305            | -0.219            | -0.117      | -0.194           | 0.265             | 0.258             |

Note: the numbers are the correlation coefficient values. \* p < 0.05, \*\* p < 0.01

**Table S3.** The allele frequency distribution of the p53codon72 and MDM2 SNP309 polymorphisms in Han populations. The total number of Han Chinese patients studied was 919.

| Populations       | Latitude | Size | p53 codon 72 |       |       |        | MDM2 SNP309 |       |       |       | Two loci genotypes |       |       |       |       |       |       |       |       |
|-------------------|----------|------|--------------|-------|-------|--------|-------------|-------|-------|-------|--------------------|-------|-------|-------|-------|-------|-------|-------|-------|
|                   |          |      | PP           | RP    | RR    | R%     | TT          | TG    | GG    | G%    | PP/TT              | PP/TG | PP/GG | RP/TT | RP/TG | RP/GG | RR/TT | RR/TG | RR/GG |
| Han(Heilongjiang) | 46.5     | 16   | 0.00         | 31.25 | 68.75 | 84.38  | 12.50       | 18.75 | 68.75 | 78.13 | 0.00               | 0.00  | 0.00  | 6.25  | 12.50 | 12.50 | 6.25  | 6.25  | 56.25 |
| Han(Jilin)        | 44       | 57   | 17.54        | 47.37 | 35.09 | 58.77  | 8.77        | 43.86 | 47.37 | 69.3  | 1.75               | 5.26  | 10.53 | 5.26  | 17.54 | 24.56 | 1.75  | 21.05 | 12.28 |
| Han(Liaonin)      | 42       | 38   | 5.26         | 50.00 | 44.74 | 69.74  | 18.42       | 34.21 | 47.37 | 64.47 | 0.00               | 2.63  | 2.63  | 10.53 | 15.79 | 23.68 | 7.89  | 15.79 | 21.05 |
| Han(Shanxi)       | 37.5     | 45   | 17.78        | 48.89 | 33.33 | 57.78  | 0.00        | 46.67 | 53.33 | 76.67 | 0.00               | 6.67  | 11.11 | 0.00  | 31.11 | 17.78 | 0.00  | 8.89  | 24.44 |
| Han(Shandong)     | 37       | 45   | 13.33        | 48.89 | 37.78 | 62.22  | 15.56       | 51.11 | 33.33 | 58.89 | 0.00               | 6.67  | 6.67  | 6.67  | 31.11 | 11.11 | 8.89  | 13.33 | 15.56 |
| Han(Gansu)        | 36       | 32   | 12.50        | 56.25 | 31.25 | 59.38  | 25.00       | 53.13 | 21.88 | 48.44 | 0.00               | 9.38  | 3.13  | 18.75 | 25.00 | 12.50 | 6.25  | 18.75 | 6.25  |
| Han(Shanxi)       | 34.5     | 49   | 12.24        | 57.14 | 30.61 | 59.18  | 24.49       | 22.45 | 53.06 | 64.29 | 0.00               | 2.04  | 10.20 | 16.33 | 10.20 | 30.61 | 8.16  | 10.20 | 12.24 |
| Han(Henan)        | 34       | 57   | 8.77         | 56.14 | 35.09 | 63.16  | 10.53       | 40.35 | 49.12 | 69.3  | 1.75               | 1.75  | 5.26  | 5.26  | 24.56 | 26.32 | 3.51  | 14.04 | 17.54 |
| Han(Jiangsu)      | 34       | 35   | 34.29        | 40.00 | 25.71 | 45.71  | 8.57        | 48.57 | 42.86 | 67.14 | 8.57               | 11.43 | 14.29 | 0.00  | 25.71 | 14.29 | 0.00  | 11.43 | 14.29 |
| Han(Anhui)        | 33       | 48   | 10.42        | 41.67 | 47.92 | 68.75  | 22.92       | 52.08 | 25.00 | 51.04 | 0.00               | 2.08  | 8.33  | 8.33  | 25.00 | 8.33  | 14.58 | 25.00 | 8.33  |
| Han(Sichuan)      | 32       | 59   | 11.86        | 61.02 | 27.12 | 57.63  | 10.17       | 37.29 | 52.54 | 71.19 | 1.69               | 3.39  | 6.78  | 6.78  | 18.64 | 35.59 | 1.69  | 15.25 | 10.17 |
| Han(Zhejiang)     | 30       | 33   | 24.24        | 60.61 | 15.15 | 45.45  | 9.09        | 30.30 | 60.61 | 75.76 | 3.03               | 6.06  | 15.15 | 6.06  | 15.15 | 39.39 | 0.00  | 9.09  | 6.06  |
| Han(Hubei)        | 30       | 41   | 34.15        | 31.71 | 34.15 | 50.00  | 19.51       | 9.76  | 70.73 | 75.61 | 2.44               | 4.88  | 26.83 | 7.32  | 2.44  | 21.95 | 9.76  | 2.44  | 21.95 |
| Han(Guizhou)      | 28       | 61   | 16.39        | 47.54 | 36.07 | 59.84  | 19.67       | 6.56  | 73.77 | 77.05 | 1.64               | 1.64  | 13.11 | 8.20  | 1.64  | 37.70 | 9.84  | 3.28  | 22.95 |
| Han(Hunan)        | 27.5     | 21   | 23.81        | 42.86 | 33.33 | 54.76  | 28.57       | 19.05 | 52.38 | 61.9  | 14.29              | 4.76  | 4.76  | 0.00  | 4.76  | 38.10 | 14.29 | 9.52  | 9.52  |
| Han(Yunnan)       | 25       | 272  | 31.62        | 43.01 | 25.37 | 46.875 | 22.79       | 35.29 | 41.91 | 59.56 | 7.72               | 9.56  | 14.34 | 9.56  | 14.71 | 18.75 | 5.51  | 11.03 | 8.82  |
| Hakka(Guangxi)    | 24       | 10   | 0.00         | 90.00 | 10.00 | 55.00  | 0.00        | 40.00 | 60.00 | 80.00 | 0.00               | 0.00  | 0.00  | 0.00  | 40.00 | 50.00 | 0.00  | 0.00  | 10.00 |



**Table S4.** The partial correlation analysis of the p53 Condon72 and MDM2 SNP309 with the environmental factors.

| Control Variables | Test      |                 | p53 Codon72 (67) |        |        |        | MDM2 SNP309 (67) |        |        |        |
|-------------------|-----------|-----------------|------------------|--------|--------|--------|------------------|--------|--------|--------|
|                   |           |                 | PP               | RP     | RR     | R      | TT               | TG     | GG     | G      |
| UV                | Latitude  | Correlation     | -0.462           | -0.221 | 0.600  | 0.629  | 0.014            | 0.145  | -0.146 | -0.113 |
|                   |           | Sig. (2-tailed) | 0.000            | 0.074  | 0.000  | 0.000  | 0.909            | 0.246  | 0.244  | 0.364  |
| Winter            | Latitude  | Correlation     | 0.047            | -0.061 | 0.030  | -0.009 | 0.145            | 0.087  | -0.162 | -0.188 |
|                   |           | Sig. (2-tailed) | 0.709            | 0.626  | 0.812  | 0.942  | 0.245            | 0.487  | 0.193  | 0.131  |
| Summer            | Latitude  | Correlation     | -0.448           | -0.217 | 0.588  | 0.614  | 0.016            | 0.149  | -0.151 | -0.122 |
|                   |           | Sig. (2-tailed) | 0.000            | 0.080  | 0.000  | 0.000  | 0.897            | 0.234  | 0.226  | 0.328  |
| Altitude          | Latitude  | Correlation     | -0.479           | -0.220 | 0.613  | 0.640  | 0.008            | 0.199  | -0.197 | -0.156 |
|                   |           | Sig. (2-tailed) | 0.000            | 0.076  | 0.000  | 0.000  | 0.950            | 0.110  | 0.113  | 0.210  |
| Longitude         | Latitude  | Correlation     | -0.484           | -0.211 | 0.607  | 0.639  | 0.027            | 0.217  | -0.233 | -0.195 |
|                   |           | Sig. (2-tailed) | 0.000            | 0.089  | 0.000  | 0.000  | 0.831            | 0.079  | 0.060  | 0.116  |
| Latitude          | UV        | Correlation     | -0.162           | 0.021  | 0.127  | 0.181  | -0.045           | 0.439  | -0.410 | -0.303 |
|                   |           | Sig. (2-tailed) | 0.193            | 0.870  | 0.310  | 0.146  | 0.718            | 0.000  | 0.001  | 0.013  |
| Winter            | UV        | Correlation     | -0.110           | 0.039  | 0.056  | 0.104  | -0.036           | 0.432  | -0.406 | -0.305 |
|                   |           | Sig. (2-tailed) | 0.379            | 0.757  | 0.657  | 0.404  | 0.772            | 0.000  | 0.001  | 0.013  |
| Summer            | UV        | Correlation     | -0.119           | 0.018  | 0.082  | 0.116  | -0.035           | 0.438  | -0.411 | -0.307 |
|                   |           | Sig. (2-tailed) | 0.343            | 0.884  | 0.513  | 0.355  | 0.779            | 0.000  | 0.001  | 0.012  |
| Altitude          | UV        | Correlation     | -0.221           | -0.104 | 0.285  | 0.296  | -0.054           | 0.458  | -0.424 | -0.312 |
|                   |           | Sig. (2-tailed) | 0.075            | 0.404  | 0.020  | 0.016  | 0.668            | 0.000  | 0.000  | 0.011  |
| Longitude         | UV        | Correlation     | -0.213           | -0.080 | 0.255  | 0.273  | -0.142           | 0.416  | -0.346 | -0.213 |
|                   |           | Sig. (2-tailed) | 0.087            | 0.525  | 0.039  | 0.027  | 0.257            | 0.001  | 0.004  | 0.086  |
| Latitude          | Winter    | Correlation     | 0.213            | 0.005  | -0.203 | -0.261 | 0.149            | 0.031  | -0.111 | -0.150 |
|                   |           | Sig. (2-tailed) | 0.086            | 0.971  | 0.101  | 0.034  | 0.232            | 0.804  | 0.374  | 0.228  |
| UV                | Winter    | Correlation     | 0.486            | 0.216  | -0.615 | -0.652 | 0.026            | -0.082 | 0.061  | 0.032  |
|                   |           | Sig. (2-tailed) | 0.000            | 0.082  | 0.000  | 0.000  | 0.834            | 0.511  | 0.627  | 0.800  |
| Summer            | Winter    | Correlation     | 0.485            | 0.218  | -0.620 | -0.654 | 0.027            | -0.103 | 0.082  | 0.050  |
|                   |           | Sig. (2-tailed) | 0.000            | 0.079  | 0.000  | 0.000  | 0.832            | 0.412  | 0.513  | 0.693  |
| Altitude          | Winter    | Correlation     | 0.512            | 0.243  | -0.662 | -0.688 | 0.037            | -0.162 | 0.137  | 0.090  |
|                   |           | Sig. (2-tailed) | 0.000            | 0.049  | 0.000  | 0.000  | 0.767            | 0.194  | 0.274  | 0.473  |
| Longitude         | Winter    | Correlation     | 0.515            | 0.206  | -0.630 | -0.670 | 0.023            | -0.194 | 0.182  | 0.133  |
|                   |           | Sig. (2-tailed) | 0.000            | 0.097  | 0.000  | 0.000  | 0.853            | 0.118  | 0.143  | 0.288  |
| Latitude          | Summer    | Correlation     | 0.063            | -0.023 | -0.033 | -0.060 | 0.029            | -0.133 | 0.119  | 0.084  |
|                   |           | Sig. (2-tailed) | 0.613            | 0.857  | 0.795  | 0.634  | 0.815            | 0.286  | 0.342  | 0.505  |
| UV                | Summer    | Correlation     | 0.090            | 0.047  | -0.122 | -0.126 | -0.001           | 0.124  | -0.118 | -0.087 |
|                   |           | Sig. (2-tailed) | 0.470            | 0.705  | 0.331  | 0.314  | 0.996            | 0.320  | 0.345  | 0.488  |
| Winter            | Summer    | Correlation     | -0.068           | -0.068 | 0.145  | 0.137  | 0.009            | -0.113 | 0.110  | 0.086  |
|                   |           | Sig. (2-tailed) | 0.586            | 0.590  | 0.247  | 0.271  | 0.940            | 0.366  | 0.379  | 0.493  |
| Altitude          | Summer    | Correlation     | 0.274            | 0.284  | -0.500 | -0.460 | 0.051            | -0.146 | 0.121  | 0.077  |
|                   |           | Sig. (2-tailed) | 0.026            | 0.021  | 0.000  | 0.000  | 0.686            | 0.243  | 0.334  | 0.538  |
| Longitude         | Summer    | Correlation     | 0.197            | 0.114  | -0.273 | -0.276 | 0.118            | -0.116 | 0.055  | -0.007 |
|                   |           | Sig. (2-tailed) | 0.113            | 0.364  | 0.026  | 0.025  | 0.344            | 0.352  | 0.663  | 0.954  |
| Latitude          | Altitude  | Correlation     | -0.056           | 0.156  | -0.131 | -0.051 | 0.007            | 0.127  | -0.128 | -0.103 |
|                   |           | Sig. (2-tailed) | 0.655            | 0.210  | 0.294  | 0.682  | 0.957            | 0.310  | 0.305  | 0.410  |
| UV                | Altitude  | Correlation     | 0.076            | 0.188  | -0.245 | -0.197 | 0.032            | -0.133 | 0.111  | 0.070  |
|                   |           | Sig. (2-tailed) | 0.544            | 0.131  | 0.047  | 0.113  | 0.798            | 0.287  | 0.374  | 0.574  |
| Winter            | Altitude  | Correlation     | 0.048            | 0.197  | -0.281 | -0.215 | 0.012            | 0.095  | -0.100 | -0.084 |
|                   |           | Sig. (2-tailed) | 0.701            | 0.112  | 0.022  | 0.082  | 0.922            | 0.447  | 0.424  | 0.503  |
| Summer            | Altitude  | Correlation     | 0.198            | 0.319  | -0.476 | -0.409 | 0.044            | -0.043 | 0.022  | 0.001  |
|                   |           | Sig. (2-tailed) | 0.112            | 0.009  | 0.000  | 0.001  | 0.724            | 0.734  | 0.863  | 0.993  |
| Longitude         | Altitude  | Correlation     | -0.020           | 0.092  | -0.070 | -0.033 | -0.128           | 0.014  | 0.058  | 0.105  |
|                   |           | Sig. (2-tailed) | 0.872            | 0.463  | 0.577  | 0.791  | 0.306            | 0.909  | 0.642  | 0.404  |
| Latitude          | Longitude | Correlation     | 0.094            | -0.135 | 0.071  | -0.011 | -0.212           | -0.225 | 0.340  | 0.360  |
|                   |           | Sig. (2-tailed) | 0.453            | 0.278  | 0.570  | 0.932  | 0.087            | 0.069  | 0.005  | 0.003  |
| UV                | Longitude | Correlation     | -0.048           | -0.170 | 0.204  | 0.156  | -0.249           | -0.028 | 0.177  | 0.247  |
|                   |           | Sig. (2-tailed) | 0.704            | 0.173  | 0.100  | 0.212  | 0.044            | 0.823  | 0.155  | 0.046  |
| Winter            | Longitude | Correlation     | 0.084            | -0.141 | 0.091  | 0.008  | -0.209           | -0.218 | 0.330  | 0.350  |
|                   |           | Sig. (2-tailed) | 0.500            | 0.259  | 0.469  | 0.949  | 0.092            | 0.079  | 0.007  | 0.004  |
| Summer            | Longitude | Correlation     | -0.039           | -0.182 | 0.210  | 0.154  | -0.239           | -0.146 | 0.276  | 0.320  |
|                   |           | Sig. (2-tailed) | 0.758            | 0.143  | 0.091  | 0.216  | 0.053            | 0.242  | 0.025  | 0.009  |
| Altitude          | Longitude | Correlation     | 0.024            | -0.080 | 0.056  | 0.022  | -0.245           | -0.166 | 0.299  | 0.343  |
|                   |           | Sig. (2-tailed) | 0.849            | 0.523  | 0.657  | 0.859  | 0.047            | 0.184  | 0.015  | 0.005  |

**Table S5.** The SNPs information of the p53 from the exon 2 to exon 6.

| Sample               | SNPs information |                |            |             |                      |             |             |           |           |           |
|----------------------|------------------|----------------|------------|-------------|----------------------|-------------|-------------|-----------|-----------|-----------|
|                      | intron 2         | intron 3       |            |             | Exon 4<br>(Condon72) | intron 4    |             |           |           |           |
|                      | rs1642785        | rs59758982     | rs17883323 | ss120037575 | rs1042522            | ss120037576 | ss120037577 | rs1794287 | rs9895829 | rs2909430 |
|                      | C to G           | 16bp insertion | C to A     | G to C      | C to G               | G to T      | T to C      | C to T    | T to C    | G to A    |
| Dong-Hunan1          | S                | -              | M          | G           | S                    | G           | T           | C         | Y         | A         |
| Dong-Hunan2          | S                | -              | M          | G           | S                    | G           | T           | C         | Y         | A         |
| Dong-Hunan3          | C                | -              | M          | G           | C                    | G           | T           | C         | Y         | A         |
| Dong-Hunan4          | G                | -              | C          | G           | G                    | G           | T           | C         | T         | R         |
| Dong-Hunan5          | S                | -              | C          | G           | S                    | G           | T           | C         | T         | A         |
| Dong-Hunan6          | S                | -              | M          | G           | S                    | G           | T           | C         | Y         | A         |
| Dong-Hunan7          | S                | -              | C          | G           | S                    | G           | T           | C         | T         | A         |
| Dong-Hunan8          | S                | -              | C          | G           | S                    | G           | T           | C         | T         | A         |
| Buyi-Guizhou1        | S                | -              | C          | G           | S                    | G           | T           | C         | T         | R         |
| Buyi-Guizhou2        | S                | -              | C          | G           | S                    | G           | T           | C         | T         | A         |
| Buyi-Guizhou3        | S                | -              | C          | G           | S                    | G           | T           | C         | T         | A         |
| Buyi-Guizhou4        | S                | -              | C          | G           | S                    | G           | T           | C         | T         | A         |
| Buyi-Guizhou5        | S                | -              | C          | G           | S                    | G           | T           | C         | T         | A         |
| Buyi-Guizhou6        | C                | +/-            | M          | G           | C                    | G           | T           | Y         | Y         | A         |
| Buyi-Guizhou7        | C                | -              | C          | G           | C                    | G           | T           | C         | T         | A         |
| Buyi-Guizhou8        | G                | -              | C          | G           | G                    | G           | T           | C         | T         | A         |
| Buyi-Guizhou9        | G                | -              | C          | G           | G                    | G           | T           | C         | T         | A         |
| Buyi-Guizhou10       | S                | -              | C          | G           | S                    | G           | T           | C         | T         | A         |
| Buyi-Guizhou11       | S                | -              | C          | G           | G                    | G           | T           | C         | T         | A         |
| Buyi-Guizhou12       | C                | -              | M          | G           | C                    | G           | T           | C         | Y         | A         |
| Buyi-Guizhou13       | C                | -              | A          | G           | C                    | G           | T           | C         | C         | A         |
| Buyi-Guizhou14       | G                | -              | C          | G           | G                    | G           | T           | C         | T         | A         |
| Buyi-Guizhou15       | G                | -              | C          | G           | G                    | G           | T           | C         | T         | A         |
| Buyi-Guizhou16       | C                | -              | C          | G           | C                    | G           | T           | C         | T         | R         |
| Buyi-Guizhou17       | S                | -              | C          | G           | S                    | G           | T           | C         | T         | A         |
| Buyi-Guizhou18       | S                | -              | C          | G           | S                    | G           | T           | C         | T         | A         |
| Buyi-Guizhou19       | G                | -              | C          | G           | G                    | G           | T           | C         | T         | A         |
| Buyi-Guizhou20       | S                | -              | C          | G           | S                    | G           | T           | C         | T         | A         |
| Buyi-Guizhou21       | G                | -              | C          | G           | G                    | G           | T           | C         | T         | A         |
| Buyi-Guizhou22       | S                | -              | C          | G           | S                    | G           | T           | C         | T         | A         |
| Shui-Guizhou1        | G                | -              | C          | G           | G                    | G           | T           | C         | T         | A         |
| Shui-Guizhou2        | S                | -              | C          | G           | S                    | G           | T           | C         | T         | A         |
| Shui-Guizhou3        | S                | -              | C          | G           | S                    | G           | T           | C         | T         | A         |
| Shui-Guizhou4        | S                | -              | C          | G           | S                    | G           | T           | C         | T         | A         |
| Shui-Guizhou5        | S                | -              | C          | G           | S                    | G           | T           | C         | T         | A         |
| Shui-Guizhou6        | S                | -              | C          | G           | S                    | G           | T           | C         | Y         | A         |
| Shui-Guizhou7        | G                | -              | C          | G           | G                    | G           | T           | C         | T         | A         |
| Shui-Guizhou8        | G                | -              | C          | G           | G                    | G           | T           | C         | T         | A         |
| Chuang-Guangxi1      | S                | -              | C          | G           | S                    | G           | T           | C         | T         | A         |
| Chuang-Guangxi2      | S                | -              | C          | G           | S                    | G           | T           | C         | T         | A         |
| Chuang-Guangxi3      | S                | -              | C          | G           | G                    | G           | T           | C         | T         | A         |
| Chuang-Guangxi4      | S                | -              | C          | G           | S                    | G           | T           | C         | T         | A         |
| Chuang-Guangxi5      | S                | -              | C          | G           | S                    | G           | T           | C         | T         | A         |
| Chuang-Guangxi6      | G                | -              | C          | G           | G                    | G           | T           | C         | T         | A         |
| Chuang-Guangxi7      | S                | -              | C          | G           | S                    | G           | T           | C         | T         | A         |
| Yao-Guangxi1         | G                | -              | C          | G           | G                    | G           | T           | C         | T         | A         |
| Yao-Guangxi2         | S                | -              | C          | G           | S                    | G           | T           | C         | T         | A         |
| Yao-Guangxi3         | S                | -              | C          | G           | S                    | G           | T           | C         | T         | A         |
| Yao-Guangxi4         | C                | +/-            | C          | G           | C                    | G           | T           | Y         | T         | A         |
| Yao-Guangxi5         | C                | -              | C          | G           | C                    | G           | T           | C         | T         | A         |
| Yao-Guangxi6         | G                | -              | C          | G           | G                    | G           | T           | C         | T         | A         |
| Yao-Guangxi7         | S                | -              | M          | G           | S                    | G           | T           | C         | Y         | A         |
| Yao-Guangxi8         | S                | -              | C          | G           | S                    | G           | T           | C         | T         | A         |
| Yao-Guangxi9         | S                | -              | C          | G           | S                    | G           | T           | C         | T         | A         |
| Yao-Guangxi10        | G                | -              | C          | G           | G                    | G           | T           | C         | T         | R         |
| Yao-Guangxi11        | S                | -              | C          | G           | S                    | G           | T           | C         | Y         | A         |
| Yao-Guangxi12        | G                | -              | C          | G           | G                    | G           | T           | C         | T         | R         |
| Yao-Guangxi13        | G                | +/-            | C          | G           | S                    | G           | T           | Y         | T         | A         |
| Yao-Guangxi14        | C                | +/-            | M          | G           | C                    | G           | T           | Y         | Y         | A         |
| Yao-Guangxi15        | S                | -              | C          | G           | S                    | G           | T           | C         | T         | A         |
| Yao-Guangxi16        | S                | -              | M          | G           | S                    | G           | T           | C         | Y         | A         |
| Yao-Guangxi17        | C                | -              | M          | G           | C                    | G           | T           | C         | Y         | A         |
| Yao-Guangxi18        | S                | -              | C          | G           | S                    | G           | T           | C         | T         | A         |
| Yao-Guangxi19        | G                | -              | C          | G           | G                    | G           | T           | C         | T         | A         |
| Yao-Guangxi20        | S                | -              | M          | G           | S                    | G           | T           | C         | Y         | A         |
| Yao-Guangxi21        | C                | +/-            | M          | G           | C                    | G           | T           | Y         | Y         | A         |
| Yao-Guangxi22        | C                | +/-            | C          | G           | C                    | G           | T           | Y         | T         | A         |
| Yao-Guangxi23        | G                | -              | C          | G           | G                    | G           | T           | C         | T         | A         |
| Manchu-Heilongjiang1 | S                | -              | C          | G           | S                    | G           | T           | C         | T         | R         |
| Manchu-Heilongjiang2 | S                | +/-            | C          | G           | S                    | G           | T           | Y         | T         | A         |
| Manchu-Heilongjiang3 | C                | -              | C          | G           | C                    | G           | T           | C         | T         | A         |
| Manchu-Heilongjiang4 | S                | -              | C          | G           | S                    | G           | T           | C         | T         | A         |
| Manchu-Heilongjiang5 | S                | -              | M          | G           | S                    | G           | T           | C         | Y         | A         |
| Manchu-Heilongjiang6 | S                | -              | M          | G           | S                    | G           | T           | C         | Y         | A         |

|                |   |     |   |   |   |   |   |   |   |   |
|----------------|---|-----|---|---|---|---|---|---|---|---|
| Han-Shanxi1    | C | -   | M | G | C | G | T | C | Y | A |
| Han-Shanxi2    | G | -   | C | G | G | G | T | C | T | A |
| Han-Shanxi3    | G | -   | C | G | G | G | T | C | T | A |
| Han-Shanxi4    | G | +/- | C | G | S | G | T | Y | T | A |
| Han-Shanxi5    | S | -   | C | G | S | G | T | C | T | A |
| Han-Shanxi6    | G | -   | C | G | G | G | T | C | T | R |
| Han-Shanxi7    | S | -   | C | G | S | G | T | C | T | A |
| Han-Shanxi8    | S | -   | C | G | S | G | T | C | T | R |
| Han-Shanxi9    | S | -   | C | G | S | G | T | C | T | R |
| Han-Shanxi10   | G | -   | C | G | G | G | T | C | T | A |
| Han-Shanxi11   | G | -   | C | G | G | G | T | C | T | A |
| Han-Shanxi12   | S | -   | M | G | S | G | T | C | Y | A |
| Han-Shanxi13   | G | -   | C | G | G | G | T | C | T | A |
| Han-Shanxi14   | S | -   | C | G | S | G | T | C | T | A |
| Han-Shanxi15   | S | -   | M | G | S | G | T | C | Y | R |
| Han-Shanxi16   | S | -   | C | G | S | G | T | C | T | R |
| Han-Shanxi17   | S | -   | C | K | S | G | T | C | T | R |
| Han-Shanxi18   | S | -   | C | G | S | G | T | C | T | A |
| Han-Shanxi19   | G | +/- | C | G | S | G | T | Y | T | G |
| Han-Shanxi20   | G | +/- | C | G | S | G | T | Y | T | A |
| Han-Shanxi21   | C | -   | C | G | C | G | T | C | T | R |
| Han-Shanxi22   | C | -   | C | G | C | G | T | C | T | G |
| Han-Shanxi23   | C | -   | M | G | C | G | T | C | Y | R |
| Han-Zhejiang1  | C | -   | C | G | G | G | T | C | T | A |
| Han-Zhejiang2  | S | -   | M | G | S | K | T | C | Y | A |
| Han-Zhejiang3  | G | -   | M | G | C | G | T | C | C | A |
| Han-Zhejiang4  | S | -   | C | G | S | G | T | C | T | A |
| Han-Zhejiang5  | G | +/- | C | G | C | G | T | Y | T | A |
| Han-Zhejiang6  | C | -   | C | G | G | G | T | C | T | A |
| Han-Zhejiang7  | S | -   | C | G | S | G | T | C | T | A |
| Han-Zhejiang8  | S | -   | M | G | S | G | T | C | Y | A |
| Han-Zhejiang9  | S | -   | C | G | S | G | T | C | T | A |
| Han-Zhejiang10 | C | +/- | C | G | G | G | T | Y | T | A |
| Han-Zhejiang11 | S | -   | C | G | S | G | T | C | T | A |
| Han-Zhejiang12 | S | -   | C | G | S | G | T | C | T | A |
| Han-Zhejiang13 | G | -   | C | G | C | G | Y | C | T | A |
| Han-Zhejiang14 | G | -   | A | G | C | G | T | C | C | A |
| Han-Zhejiang15 | S | -   | C | G | G | G | T | C | T | R |
| Han-Zhejiang16 | C | -   | C | G | G | G | T | C | T | A |
| Han-Zhejiang17 | S | -   | C | G | S | G | T | C | T | A |
| Han-Zhejiang18 | C | -   | C | G | G | G | T | C | T | A |
| Han-Zhejiang19 | S | -   | C | G | S | G | T | C | T | A |
| Han-Zhejiang20 | G | -   | C | G | C | G | T | C | T | A |
| Han-Zhejiang21 | G | -   | C | G | C | G | T | C | T | A |
| Han-Zhejiang22 | G | -   | M | G | C | G | T | C | Y | A |
| Han-Zhejiang23 | S | -   | C | G | S | G | T | C | T | A |
| Han-Zhejiang24 | S | -   | C | G | S | G | T | C | T | A |
| Han-Anhui1     | G | +/- | C | G | C | G | T | Y | T | A |
| Han-Anhui2     | S | -   | C | G | S | G | T | C | T | A |
| Han-Anhui3     | C | -   | C | G | G | G | T | C | T | A |
| Han-Anhui4     | G | -   | C | G | C | G | T | C | T | A |
| Han-Anhui5     | S | -   | C | G | S | G | T | C | T | A |
| Han-Anhui6     | C | -   | C | G | G | G | T | C | T | A |
| Han-Anhui7     | G | -   | C | G | C | G | T | C | T | A |
| Han-Anhui8     | S | -   | C | G | G | G | T | C | T | A |
| Han-Anhui9     | C | -   | C | G | G | G | T | C | T | A |
| Han-Anhui10    | S | -   | C | G | S | G | T | C | T | R |
| Han-Anhui11    | S | -   | C | G | S | G | T | C | T | A |
| Han-Anhui12    | C | -   | C | G | G | G | T | C | T | A |
| Han-Anhui13    | C | -   | C | G | G | G | T | C | T | A |
| Han-Anhui14    | S | -   | C | G | S | G | T | C | T | A |
| Han-Anhui15    | C | -   | C | G | G | G | T | C | T | A |
| Han-Anhui16    | S | -   | C | G | S | G | T | C | T | A |
| Han-Anhui17    | S | -   | C | G | S | G | T | C | T | A |
| Han-Anhui18    | S | -   | C | G | S | G | T | C | T | A |
| Han-Anhui19    | C | -   | C | G | G | G | T | C | T | A |
| Han-Anhui20    | S | -   | C | G | S | G | T | C | T | A |
| Han-Anhui21    | C | -   | C | G | C | G | T | C | T | A |
| Han-Anhui22    | C | -   | C | G | G | G | T | C | T | A |
| Han-Anhui23    | S | -   | C | G | S | G | T | C | T | A |
| Han-Anhui24    | S | -   | C | G | S | G | T | C | T | A |
| Han-Anhui25    | G | +/+ | C | G | C | G | T | C | T | R |
| Han-Anhui26    | S | -   | C | G | S | G | T | C | T | A |
| Han-Anhui27    | C | -   | C | G | G | G | T | C | T | A |
| Tujia-Hunan1   | G | -   | C | G | C | G | T | C | T | A |
| Tujia-Hunan2   | S | -   | C | G | S | G | T | C | T | A |
| Tujia-Hunan3   | G | +/- | C | G | C | G | T | Y | T | A |
| Tujia-Hunan4   | G | +/- | C | G | C | G | T | C | Y | R |
| Tujia-Hunan5   | C | -   | C | G | G | G | T | C | T | R |
| Tujia-Hunan6   | C | -   | C | G | G | G | T | C | T | A |
| Tujia-Hunan7   | G | -   | C | G | C | G | T | C | T | A |
| Tujia-Hunan8   | G | -   | C | G | C | G | T | C | T | A |

|               |   |     |   |   |   |   |   |   |   |   |
|---------------|---|-----|---|---|---|---|---|---|---|---|
| Tujia-Hunan9  | S | -   | C | G | S | G | T | C | T | A |
| Tujia-Hunan10 | G | -   | M | G | C | G | T | C | Y | A |
| Tujia-Hunan11 | C | -   | C | G | G | G | T | C | T | A |
| Tujia-Hunan12 | S | -   | C | G | S | G | T | C | T | R |
| Tujia-Hunan13 | S | -   | C | G | S | G | T | C | T | R |
| Han-Hunan1    | G | -   | C | G | C | G | T | C | T | A |
| Han-Hunan2    | C | +/- | C | G | S | G | T | Y | T | A |
| Han-Hunan3    | C | -   | C | G | G | G | T | C | T | A |
| Han-Hunan4    | C | -   | C | G | G | G | T | C | T | A |
| Han-Hunan5    | C | -   | C | G | G | G | T | C | T | A |
| Han-Hunan6    | C | -   | C | G | G | G | T | C | T | A |
| Han-Hubei     | S | -   | C | G | S | G | T | C | T | A |
| Han-Liaonin   | G | -   | C | G | G | G | T | C | T | A |
| Han-Liaonin   | C | -   | C | G | C | G | T | C | T | A |
| Han-Liaonin1  | C | -   | M | G | C | G | T | C | Y | A |
| Han-Liaonin2  | C | -   | C | G | S | G | T | C | T | A |
| Han-Liaonin3  | G | -   | C | G | G | G | T | C | T | A |
| Han-Liaonin4  | S | -   | M | G | S | G | T | C | Y | A |
| Han-Liaonin5  | G | -   | C | G | G | G | T | C | T | A |
| Han-Liaonin6  | S | -   | C | G | S | G | T | C | T | A |
| Han-Liaonin7  | C | -   | C | G | G | G | T | C | T | A |
| Han-Jilin1    | S | -   | M | G | S | G | T | C | Y | A |
| Han-Jilin2    | S | -   | C | G | S | G | T | C | T | A |
| Han-Jilin3    | S | -   | C | G | S | G | T | C | T | A |
| Han-Jilin4    | S | -   | M | G | S | G | T | C | Y | A |
| Han-Jilin5    | G | -   | C | G | G | G | T | C | T | A |
| African1      | G | -   | M | G | C | G | T | C | Y | R |
| African2      | S | -   | M | G | S | G | T | C | Y | A |
| African3      | G | -   | C | G | C | G | T | Y | T | A |
| African4      | G | -   | A | G | C | G | T | C | C | A |
| African5      | G | +/- | M | G | C | G | T | Y | Y | A |
| African6      | C | +/- | C | G | C | G | T | Y | T | A |
| African7      | S | -   | C | G | S | G | T | C | T | A |
| African8      | G | -   | M | G | C | G | T | C | Y | A |
| African9      | S | -   | M | G | S | G | T | C | Y | A |
| African10     | G | -   | C | G | C | G | T | C | T | A |
| African11     | S | -   | C | G | S | G | T | C | T | A |
| African12     | S | /+  | C | G | S | G | T | Y | T | A |
| African13     | C | /+  | C | G | S | G | T | Y | T | A |
| African14     | G | /+  | C | G | C | G | T | Y | T | A |
| African15     | S | -   | C | G | S | G | T | C | T | A |
| African16     | G | +/+ | C | G | C | G | T | T | T | A |
| African17     | C | -   | C | G | G | G | T | C | T | A |
| African18     | C | +/- | C | G | S | G | T | C | T | A |
| African19     | G | +/- | C | G | C | G | T | T | T | A |
| African20     | G | +/- | C | G | C | G | T | Y | T | A |

**Table S6.** The Hardy-Weinberg Equilibrium test of p53 Codon72 and MDM2 SNP309.

| Population            | p53 Codon72     |                                |        | MDM2 SNP309     |                           |        |
|-----------------------|-----------------|--------------------------------|--------|-----------------|---------------------------|--------|
|                       | Probability     | HD*                            | HE*    | Probability     | HD*                       | HE*    |
|                       | P-val           | P-val                          | P-val  | P-val           | P-val                     | P-val  |
| Russ                  | 0.47            | 0.9174                         | 0.258  | 0.2947          | 0.212                     | 0.9365 |
| Uzbek                 | 0.4613          | 0.9214                         | 0.2517 | 1               | 0.7483                    | 0.5276 |
| Tajik                 | 0.3351          | 0.945                          | 0.1717 | 0.7484          | 0.8283                    | 0.3808 |
| Kazak                 | 0.6747          | 0.4184                         | 0.8449 | 0.5642          | 0.3657                    | 0.8261 |
| Uigur                 | 0.033           | 0.9963                         | 0.0222 | 0.241           | 0.9436                    | 0.167  |
| Khalkhas              | 0.7597          | 0.8027                         | 0.4102 | 0.4114          | 0.9077                    | 0.2189 |
| Tatar                 | 0.4152          | 0.9447                         | 0.2703 | 0.5489          | 0.8465                    | 0.344  |
| Xibe                  | 0.4375          | 0.2837                         | 0.9122 | 0.2111          | 0.1251                    | 0.9753 |
| Salar                 | 0.408           | 0.2353                         | 0.8994 | 1               | 0.7056                    | 0.5192 |
| Tu                    | 0.5622          | 0.3192                         | 0.8537 | 0.0261          | 0.0216                    | 0.9961 |
| Baonan                | 1               | 0.5388                         | 0.6837 | 1               | 0.6808                    | 0.5448 |
| Dongxiang             | 0.0193          | 0.9976                         | 0.0113 | 1               | 0.5612                    | 0.6535 |
| Yugur                 | 0.0049          | 0.9996                         | 0.003  | 0.7768          | 0.4661                    | 0.746  |
| Hezhe                 | 0.5309          | 0.322                          | 0.8619 | 0.3245          | 0.9405                    | 0.196  |
| Oroqen                | 0.7509          | 0.8386                         | 0.3684 | 1               | 0.5456                    | 0.7408 |
| Korea                 | 0.5264          | 0.272                          | 0.8909 | 0.0042          | 0.0029                    | 1      |
| Manchu (Liaonin)      | 0.0217          | 0.9974                         | 0.0157 | 0.2939          | 0.9576                    | 0.1616 |
| Mangol                | 1               | 0.5522                         | 0.6831 | 0.0647          | 0.053                     | 0.9898 |
| Daur                  | 0.5662          | 0.3425                         | 0.8376 | 0.0081          | 0.9994                    | 0.005  |
| Ewenki                | 0.3475          | 0.2563                         | 0.9006 | 0.2477          | 0.1847                    | 0.9313 |
| Han (Heilongjiang)    | 1               | 1                              | 0.6941 | 0.1081          | 0.1081                    | 0.9957 |
| Han (Liaonin)         | 0.4428          | 0.9323                         | 0.2535 | 0.1541          | 0.0973                    | 0.9776 |
| Han (Jilin)           | 1               | 0.5133                         | 0.6965 | 1               | 0.6793                    | 0.5646 |
| Manchu (Heilongjiang) | 0.1154          | 0.9914                         | 0.0623 | 0.0173          | 0.0173                    | 0.9995 |
| Han (Gansu)           | 0.47            | 0.9174                         | 0.258  | 1               | 0.7347                    | 0.5338 |
| Han (Shandong)        | 1               | 0.6938                         | 0.5524 | 1               | 0.7277                    | 0.5055 |
| Han (Henan)           | 0.1618          | 0.965                          | 0.1117 | 0.7562          | 0.4354                    | 0.7823 |
| Han (Shanxi)          | 1               | 0.5957                         | 0.6447 | 0.0863          | 1                         | 0.0466 |
| Han (Shannxi)         | 0.2518          | 0.9358                         | 0.1799 | 0.0004          | 0.0004                    | 1      |
| Han Zhejiang          | 0.3             | 0.9404                         | 0.1998 | 0.3452          | 0.2559                    | 0.9404 |
| Tujia                 | 0.2594          | 0.9678                         | 0.1426 | 0.0016          | 0.0016                    | 1      |
| Han (Hubei)           | 0.0271          | 0.0163                         | 0.9974 | 0               | 0                         | 1      |
| Dong (Hunan)          | 0.0782          | 0.9857                         | 0.0574 | 0.0026          | 0.0026                    | 0.9998 |
| Han (Hunan)           | 0.6605          | 0.3846                         | 0.8822 | 0.0074          | 0.0074                    | 0.9997 |
| Miao (Guizhou)        | 0.4719          | 0.8882                         | 0.3208 | 0.2384          | 0.2384                    | 0.9643 |
| Han (Guizhou)         | 1               | 0.5452                         | 0.6629 | 0               | 0                         | 1      |
| Tibetan (Dangxiang)   | 1               | 0.5499                         | 0.5156 | 0               | 0                         | 1      |
| Tibetan (Changdou)    | 0.1115          | 0.9701                         | 0.079  | 0.0011          | 0.0011                    | 0.9999 |
| Tibetan (Rikaze)      | 0.016           | 0.9992                         | 0.008  | 1               | 0.701                     | 0.5851 |
| Tibetan (Qinghai)     | 0.2542          | 0.9354                         | 0.1285 | 0.8412          | 0.665                     | 0.4937 |
| Han (Yunnan)          | 0.0282          | 0.0153                         | 0.9919 | 0               | 0                         | 1      |
| Qiang                 | 0.5628          | 0.8544                         | 0.3192 | 1               | 0.5712                    | 0.6848 |
| Dong (Guizhou)        | 0.0001          | 1                              | 0.0001 | 0.6199          | 0.8083                    | 0.3564 |
| Gelo                  | 1               | 0.682                          | 0.5184 | 0.5869          | 0.377                     | 0.8073 |
| Buyi                  | 0.0119          | 0.0107                         | 0.9984 | 0               | 0                         | 1      |
| Shui                  | 1               | 0.8548                         | 0.5514 | 0.0899          | 0.0899                    | 0.9984 |
| Hakka (Guangxi)       | 0.0455          | 1                              | 0.0305 | 1               | 1                         | 0.6935 |
| Dong (Guangxi)        | 0.6376          | 0.4542                         | 0.8719 | 0.0488          | 0.0488                    | 0.9994 |
| Yao (Guangxi)         | 0.2742          | 0.9449                         | 0.149  | 0.0025          | 0.0025                    | 0.9998 |
| Chuang (Guangxi)      | 0.0384          | 0.9956                         | 0.0299 | 0               | 0                         | 1      |
| Deang                 | 0.4559          | 0.3159                         | 0.8929 | 1               | 0.631                     | 0.8103 |
| Jingpo                | 0.0136          | 0.999                          | 0.0109 | 1               | 0.5787                    | 0.7152 |
| Yi                    | 0.5491          | 0.3274                         | 0.8541 | 0.7138          | 0.4511                    | 0.8038 |
| Chuang (Yunnan)       | 1               | 0.5652                         | 0.6754 | 0.001           | 0.0008                    | 1      |
| Miao (Yunnan)         | 0.4025          | 0.8942                         | 0.2481 | 0.0774          | 0.0506                    | 0.9872 |
| Maonan                | 0.8022          | 0.7368                         | 0.4494 | 0.5803          | 0.3625                    | 0.818  |
| Gin                   | 0.3726          | 0.1927                         | 0.9281 | 0.1373          | 0.1077                    | 0.9681 |
| Mulam                 | 0.4407          | 0.262                          | 0.8764 | 0.0055          | 0.0046                    | 0.9992 |
| She                   | 0.3024          | 0.9255                         | 0.1787 | 0.5427          | 0.8913                    | 0.2741 |
| Li                    | 0.4344          | 0.2796                         | 0.8673 | 1               | 0.5944                    | 0.6375 |
| Wa                    | 0.327           | 0.2086                         | 0.9297 | 0.1425          | 0.1039                    | 0.9764 |
| Dai                   | 1               | 0.6066                         | 0.6295 | 0.2626          | 0.184                     | 0.9303 |
| Han (Jiangsu)         | 0.3073          | 0.1842                         | 0.9442 | 0.7122          | 0.8155                    | 0.4554 |
| Han (Anhui)           | 1               | 0.5145                         | 0.7366 | 1               | 0.6948                    | 0.528  |
| Han (Sichuan)         | 0.1072          | 0.9841                         | 0.055  | 0.5268          | 0.3207                    | 0.8619 |
| Cambodian             | 0.1876          | 0.9772                         | 0.1486 | 1               | 0.8309                    | 0.5213 |
| Indonesian            | 0.8193          | 0.7094                         | 0.4643 | 0.4092          | 0.8842                    | 0.2637 |
|                       | Fisher's method | Chi2:<br>Df: 134<br>P = 0.0024 |        | Fisher's method | Chi2:<br>Df: 134<br>P = 0 |        |

Note: \* HD refers to the Hardy-Weinberg equilibrium test for heterozygote deficit, and HE refers to the Hardy-Weinberg equilibrium test for heterozygote excess. Populations deviated from HWE are highlighted.



**Table S8.** The latitude, UV radiation and low temperature correlation analysis on the two-loci genotype combination.

| Environmental Factors | Populations          | Two-loci genotypes |        |          |        |         |          |          |          |          |
|-----------------------|----------------------|--------------------|--------|----------|--------|---------|----------|----------|----------|----------|
|                       |                      | PP/TT              | PP/TG  | PP/GG    | RP/TT  | RP/TG   | RP/GG    | RR/TT    | RR/TG    | RR/GG    |
| Latitude              | All populations (67) | -0.43**            | -0.27* | -0.35**  | -0.04  | 0.06    | -0.18    | 0.36**   | 0.46**   | 0.33**   |
|                       | Han population (17)  | -0.425             | -0.084 | -0.302   | 0.168  | 0.06    | -0.547*  | -0.08    | 0.42     | 0.562*   |
| UV Radiation          | All populations (67) | -0.137             | 0.205  | -0.408** | 0.03   | 0.319** | -0.309*  | -0.008   | 0.37**   | -0.036   |
|                       | Han population (17)  | -0.193             | 0.446  | -0.152   | 0.248  | 0.376   | -0.606** | -0.311   | 0.435    | 0.073    |
| Low Temperature       | All populations (67) | 0.353**            | 0.194  | 0.446**  | 0.16   | -0.015  | 0.196    | -0.322** | -0.449** | -0.322** |
|                       | Han population (17)  | 0.414              | 0.144  | 0.346    | -0.227 | 0.018   | 0.509*   | -0.017   | -0.379   | -0.588*  |

Note: \* Correlation is significant at the 0.05 level; \*\* Correlation is significant at the 0.01 level (two-tailed t test).
